# Supplementary material for: Evaluating the Relationship Between The Banking System Stability and The Internal Capital Adequacy Assessment Process: Evidence From The Egyptian Banking Sector
Source: Preprints.org preprint supplement (doi:10.20944/preprints201810.0303.v1), 2018-10-15
Supplement: Supplementary file 3 [file supplementary]

## Sheet: HSBC CAR
		Capital Adequacy Ratio							Capital Adequacy Ratio
		December, 2013 (scenario 1: actual scenario)							December, 2013 (scenario 1: actual scenario)
				(million £)								(million £)
		Items	Actual 31/12/12013	Actual 31/12/12012					Items	Actual 31/12/12013	Actual 31/12/12016	Actual 30/06/12017
		Total Capital Base	33543	33464					Total Capital Base	33543	38522	39274
		Tier 1 capital	22438	22088			9435		Tier 1 capital	22438	30218	31150
		Tier 2 capital	11105	11376					Tier 2 capital	11105	8304	8124
		Total RWA	185879	193402	185879	193402			Total RWA	185879	245237	239703
		Credit Risk	145909	149970					Credit Risk	145909	197529	194547
		Market Risk	17931	21566					Market Risk	17931	24975	22423
		Operational Risk	22039	21866					Operational Risk	22039	22733	22733
		Actual CAR %	0.180456	0.173028					Actual CAR %	0.180456	0.157081	0.163844
											245237	239703
									Capital Adequacy Ratio
			185879	193402					June, 2017 - December 2016 - December 2013
												(million £)
						17	16	13	Items	Interim 30/06/12017	Actual 31/12/12016	Actual 31/12/2013
			1.25			0.0195213	0.148436		Total Capital Base	39274	38522	33543
									Tier 1 capital	31150	30218	22438
						17	16	13	Tier 2 capital	8124	8304	11105
						-0.0225659	0.319337		Total RWA	239703	245237	185879
									Credit Risk	194547	197529	145909
									Market Risk	22423	24975	17931
									Operational Risk	22733	22733	22039
									Actual CAR %	0.163844	0.157081	0.180456

## Sheet: SAMBA CAR
Capital Adequacy Ratio							Capital Adequacy Ratio
December, 2013 actual figures							December, 2013 actual figures
		(000 SAR)											(000 SAR)
Items	Actual 31/12/2013	Actual 31/12/2012					Items		Interim 30/06/2017	Actual 31/12/2016	Actual 31/12/2015	Actual 31/12/2014	Actual 31/12/2013
Total Capital Base	36523868	33411112	36523868	33411112	0.0931653		Total Capital Base		45002788	44033982	41447099	40240728	36523868
Tier 1 capital	34954464	31714417			0.102163		Tier 1 capital		43863987	42810511	40237264	38798653	34954464
Tier 2 capital	1569404	1696695					Tier 2 capital		1138801	1223471	1209835	1442075	1569404
Total RWA	188295390	166670168	188295390	166670168	0.129749		Total RWA		228981479	196082355	206643117	202580614	188295390
Credit Risk	161664756	142000392	0.185636	0.190283			Credit Risk		202040921	171634477	181689185	173822138	161664756
Market Risk	14967138	12936644			0.125749		Market Risk		13636938	11325363	11862675	16570138	14967138
Operational Risk	11663496	11733132					Operational Risk		13303620	13122515	13091257	12188338	11663496
Actual CAR %	0.193971	0.200462					Actual CAR %		0.196535	0.224569	0.200573	0.198641	0.193971
	0.193971	0.200462
											0.0974412	0.075866
				0.09375
			-0.578514

## Sheet: CIB CAR
					Capital Adequacy Ratio
					December, 2016 (scenario 1: actual scenario)
							(000EGP)
					Items	Actual 31/12/12016	Actual 31/12/12015
					Total Capital Base	16120502	15355371
					Tier 1 capital	14509944	14350155
					Tier 2 capital	1610558	1005216
	20965797	24965797	24771925	-193872	Total RWA	150097333	95619994
	14509944	18509944			Credit Risk	128698992	79363222	0.621645		62	98	0.580645
					Market Risk	6701579	4030779	0.662601
					Operational Risk	14696762	12225993	0.202091
					Actual CAR %	0.1074	0.160587	-0.331204		15.61	14.1	0.107092	14.7	0.0619048
						0.1074	0.160587						14.5	0.0765517
						-0.331204
					Capital Adequacy Ratio							0.1397	0.300741
					December, 2016 (scenario 1: actual scenario)
							(000EGP)
					Items	Actual 31/12/12016	Actual 31/12/12015
1.035	1.36	0.31401			Total Capital Base	2827593	2569770
					Tier 1 capital	2530903	2352631
					Tier 2 capital	296690	217139
					Total RWA	24443255	17856494
					Credit Risk	20840408	14855976	0.40283		14	19	0.357143
					Market Risk	154366	92958	0.660599
					Operational Risk	3448481	2907561	0.186039
					Actual CAR %	0.1157	0.1439	-0.195969
						0.1885
						0.629213
					Capital Adequacy Ratio. March 2017 (scenario 3: proposed March 2017 scenario)
								(000EGP)
					Items	Proposed 31/03/2017	Actual	Actual 31/12/12016
							31/03/2017
					Total Capital Base	24342281	22608896	20965797
					Tier 1 capital	20980170	20980170	19355239
					Tier 2 capital	1628726	1628726	1610558
					Total RWA	156008876	156008876	150097333
					Actual CAR %	0.156	0.1449	0.139681	0.300567
					Capital Adequacy Ratio
					Scenario 3: Proposed March 2017
							(000EGP)
					Items	Proposed 31/03/2017	Actual 31/03/2017
							31/03/2017
					Total Capital Base	24342281	22608896
					Tier 1 capital	20980170	20980170
					Tier 2 capital	1628726	1628726
					Total RWA	156008876	156008876
					Actual CAR %	0.156	0.1449
						0.156031	0.144921

## Sheet: CAE CAR
			Capital Adequacy Ratio
			December, 2016 (scenario 1: actual scenario)
					(000EGP)
			Items	Actual 31/12/12016	Actual 31/12/12015
			Total Capital Base	2827593	2569770	2827593	2569770						4884378
			Tier 1 capital	2530903	2352631					14			4025959
			Tier 2 capital	296690	217139					19	0.357143		858419
			Total RWA	24443255	17856495	24443255	17856495						25911945
			Credit Risk	20840408	14855976	0.40283							22308614
			Market Risk	154366	92958								154860
			Operational Risk	3448481	2907561								3448471
			Actual CAR %	0.11568	0.143912	0.11568	0.143912	-0.196178		-0.195969			0.188499
				0.11568	0.143912
				0.1885
				0.629497	0.629213

## Sheet: UNBE CAR
Capital Adequacy Ratio
December, 2016 (scenario 1: actual scenario)
		(000EGP)
Items	Actual 31/12/2016	Actual 31/12/2015
Total Capital Base	1657244	1671428
Tier 1 capital	1563283	1466078
Tier 2 capital	93522	76810
Total RWA	14735426	6990010
Actual CAR %	0.1125	0.2207
Capital Adequacy Ratio
June, 2017 (scenario 2: amended scenario)
		(000EGP)
Items	Actual 31/12/2016	2017-06-01
Total Capital Base	1657244	1997360
Tier 1 capital	1563283	1863617
Tier 2 capital	93522	133743
Total RWA	14735426	15441061
Actual CAR %	0.1125	0.1294

## Sheet: eviews
Year/Bank	HSBC (in Million £)				Samba (000 SAR)
/Items	CAR	Tier 1	Tier 2	RWA	CAR	Tier 1	Tier 2	RWA
	CARH	Tier1H	Tier2H	RWAH	CARS	Tier1S	Tier2s	RWAS
2008	0.1123	17523	11442	257883	0.1408	20031923	1516176	153058900
2009	0.1672	22707	11272	203281	0.1712	22469344	1509739	140085476
2010	0.1721	22955	11758	201720	0.1887	25575235	1507250	143486898
2011	0.1519	22739	11837	227679	0.1915	28231034	1658642	156050317
2012	0.1843	24017	11634	193402	0.2005	31714417	1696695	166670168
2013	0.192	24108	11582	185879	0.194	34954464	1569404	188295390
2014	0.1377	25138	8418	243652	0.1986	38798653	1442075	202580614
2015	0.1552	27017	8586	229382	0.2006	40237264	1209835	206643117
2016	0.1571	30218	8304	245237	0.2246	42810511	1223471	196082355
2017-06-01	0.1638	31150	8124	239703	0.1965	43863987	1138801	228981479
Dependent Variable: CARH
Method: Least Squares
Sample: 2008 2016
Included observations: 9
Variable	Coefficient	Std. Error	t-Statistic	Prob.
C	18.9429	3.69461	5.12717	0.0037
RWAH	-7.35e-05	5.78e-06	-12.7153	0.0001
TIER1H	0.000379	5.2e-05	7.2954	0.0008
TIER2H	0.000386	0.000136	2.84415	0.0361
R-squared	0.993655	Mean dependent var		15.8867
Adjusted R-squared	0.989849	S.D. dependent var		2.4163
S.E. of regression	0.243451	Akaike info criterion		0.313304
Sum squared resid	0.296343	Schwarz criterion		0.400959
Log likelihood	2.59013	F-statistic		261.026
Durbin-Watson stat	1.76631	Prob(F-statistic)		7e-06
Dependent Variable: CARS
Method: Least Squares
Sample: 2008 2016
Included observations: 9
Variable	Coefficient	Std. Error	t-Statistic	Prob.
C	16.8531	1.08124	15.5868	0
RWAS	-1.14e-07	6.38e-09	-17.9365	0
TIER1S	6.1e-07	2.03e-08	30.1008	0
TIER2S	1.75e-06	4.49e-07	3.8933	0.0115
R-squared	0.996652	Mean dependent var		19.0056
Adjusted R-squared	0.994643	S.D. dependent var		2.31509
S.E. of regression	0.169453	Akaike info criterion		-0.41138
Sum squared resid	0.143571	Schwarz criterion		-0.32373
Log likelihood	5.85122	F-statistic		496.079
Durbin-Watson stat	2.13842	Prob(F-statistic)		1e-06
